# Supplementary material for: Guided Self-Assembly of ES-Derived Lung Progenitors into Biomimetic Tube Structures That Impact Cell Differentiation
Source: MDPI journal article supplement (doi:10.3390/bioengineering8120209), 2021-12-10
Supplement: s1 [file s1]

## Guided Self-Assembly of ES-derived Lung Progenitors into biomimetic tube structures that impact cell differentiation

### Supplementary Information

|   | 1                                                | 2                                                                                                   | 3                                                |
|---|--------------------------------------------------|-----------------------------------------------------------------------------------------------------|--------------------------------------------------|
| A | Collagen I (250µg/ml)                            | Collagen I (125µg/ml)<br>Collagen III (125µg/ml)                                                    | Fibronectin (125µg/ml)<br>Collagen IV (125µg/ml) |
| B | Collagen III (250µg/ml)                          | Collagen I (125µg/ml)<br>Collagen IV (125µg/ml)                                                     | Fibronectin (125µg/ml)<br>Collagen VI (125µg/ml) |
| C | Collagen IV (250µg/ml)                           | Collagen I (125µg/ml)<br>Collagen V (125µg/ml)                                                      | Fibronectin (125µg/ml)<br>Laminin (125µg/ml)     |
| D | Collagen V (250µg/ml)                            | Collagen I (125µg/ml)<br>Collagen VI (125µg/ml)                                                     | Fibronectin (125µg/ml)<br>Vitronectin(125µg/ml)  |
| E | Collagen VI (250µg/ml)                           | Collagen I (125µg/ml)<br>Fibronectin (125µg/ml)                                                     | Laminin (125µg/ml)<br>Collagen IV (125µg/ml)     |
| F | Fibronectin (250µg/ml)                           | Collagen I (125µg/ml)<br>Laminin (125µg/ml)                                                         | Laminin (125µg/ml)<br>Collagen VI (125µg/ml)     |
| G | Laminin (250µg/ml)                               | Collagen I (125µg/ml)<br>Vitronectin (125µg/ml)                                                     | Vitronectin (125µg/ml)<br>Collagen IV (125µg/ml) |
| H | Vitronectin (250µg/ml)                           | Collagen I (125µg/ml)<br>Topoelastin (125µg/ml)                                                     | Vitronectin (125µg/ml)<br>Collagen VI (125µg/ml) |
| I | Topoelastin (250µg/ml)                           | Fibronectin (83.3µg/ml)<br>Laminin (83.3µg/ml)<br>Collagen I (83.3µg/ml)                            | Vitronectin (125µg/ml)<br>Laminin (125µg/ml)     |
| J | Collagen IV (125µg/ml)<br>Collagen VI (125µg/ml) | Fibronectin (83.3µg/ml)<br>Laminin (83.3µg/ml)<br>Collagen IV (83.3µg/ml)                           | Vitronectin (125µg/ml)<br>Topoelastin (125µg/ml) |
| K | Collagen III (125µg/ml)<br>Collagen V (125µg/ml) | Vitronectin (62.5µg/ml)<br>Laminin (62.5µg/ml)<br>Collagen I (62.5µg/ml)<br>Collagen IV (62.5µg/ml) | Topoelastin (125µg/ml)<br>Collagen IV (125µg/ml) |
| L | Negative Control (250 µg/ml)                     | Fibronectin (62.5µg/ml)<br>Laminin (62.5µg/ml)<br>Collagen I (62.5µg/ml)<br>Collagen IV (62.5µg/ml) | Topoelastin (125µg/ml)<br>Collagen VI (125µg/ml) |

**Supplemental Figure S1. Advanced Biomatrix ECM Select® Array Kit Ultra-36, extracellular matrix screening array setup.** From Advanced BioMatrix (<https://www.advancedbiomatrix.com/extracellular-matrix-screening-array/ecm-select-array-kit-ultra-36/>).

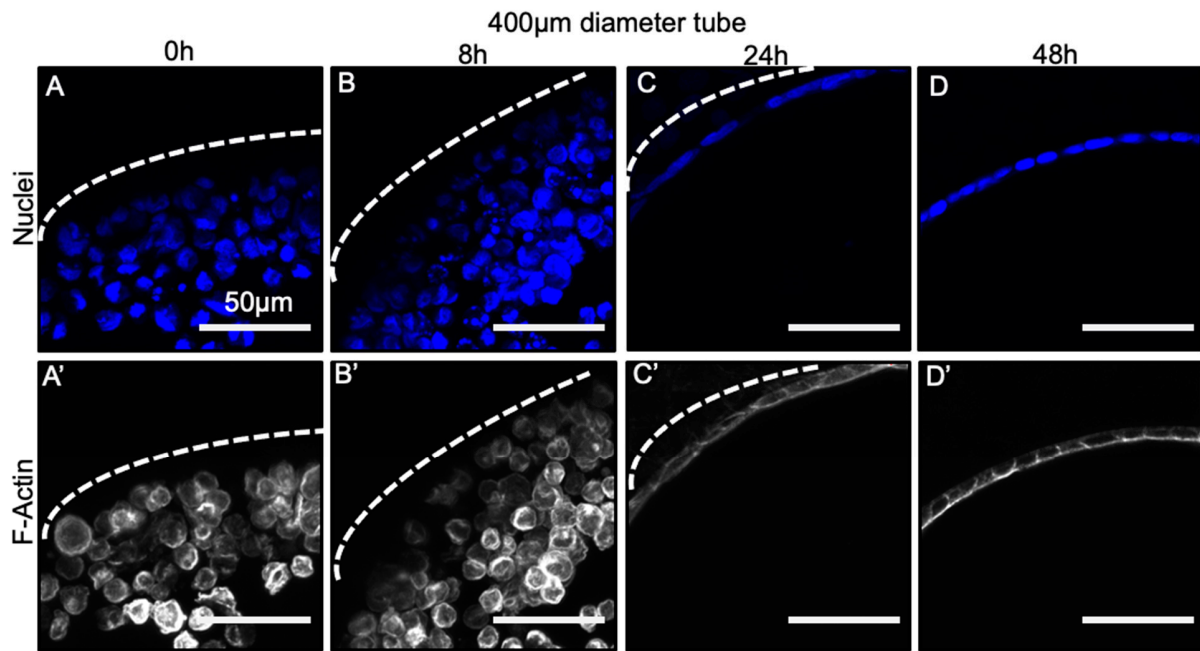

**Supplemental Figure S2. Cell seeding over a 48 hour time period.** Fluorescent micrographs of 400µm tubes seeded with day 17 lung progenitors and stained with DAPI (blue) at 0h (A), 8 hours (B), 24 hours (C), and 48 hours (D) showing partial tube formation by 8 hours and complete formation occurring within 48 hours. Corresponding F-actin staining (white) in (A'-D') reveals a similar pattern. Corresponding F-actin staining (white) in (E'-H') reveals a similar pattern; n=3.

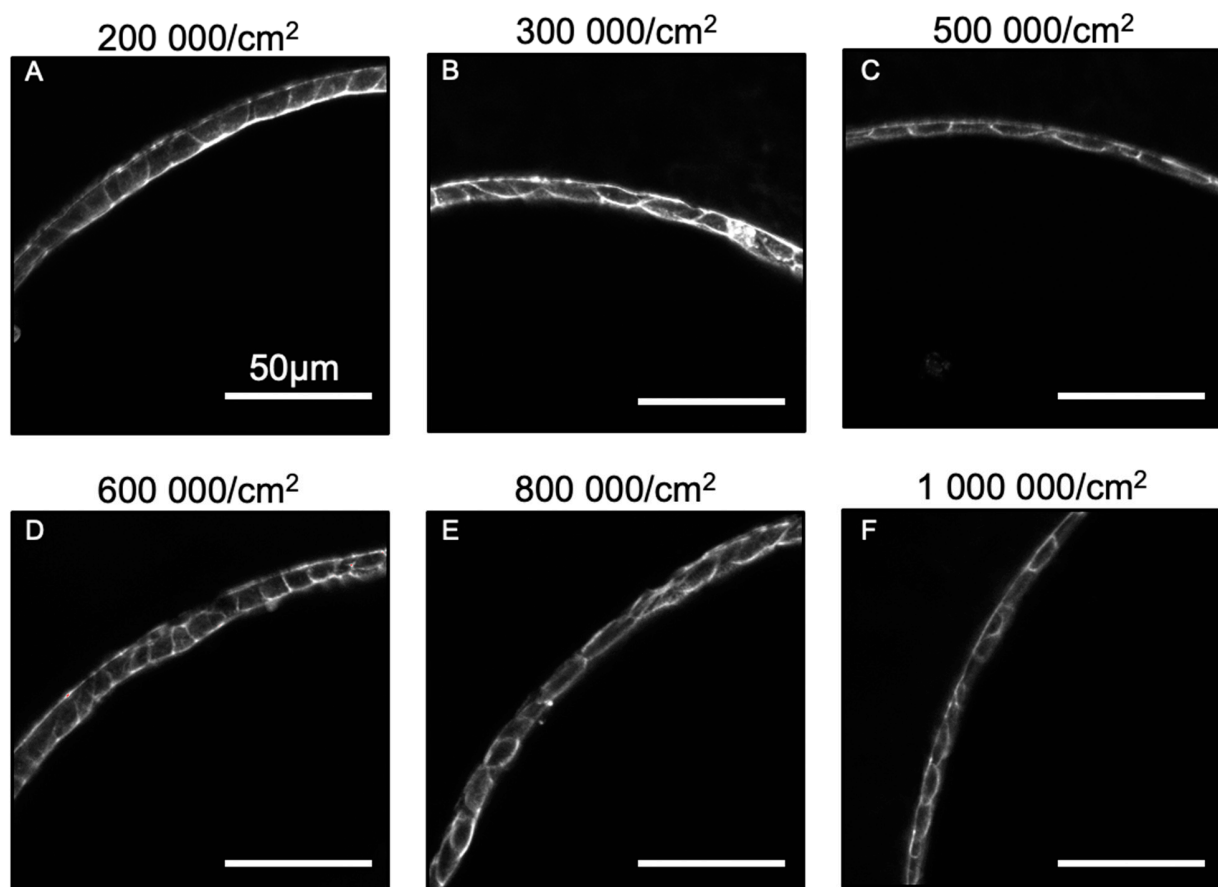

**Supplemental Figure S3. Cell seeding at various densities.** Fluorescent micrographs of day 17 lung progenitor cells seeded for 8 days in 400µm tubes and stained for F-actin (white) at 200 000 cells/cm<sup>2</sup> (A), 300 000cells/cm<sup>2</sup> (B), 500 000 cells/cm<sup>2</sup> (C), 600 000cells/cm<sup>2</sup> (D), 800 000 cells/cm<sup>2</sup> (E), 1 000 000cells/cm<sup>2</sup> (F) show that tube formation occurs without aggregate formation at these cell seeding densities; n=3.

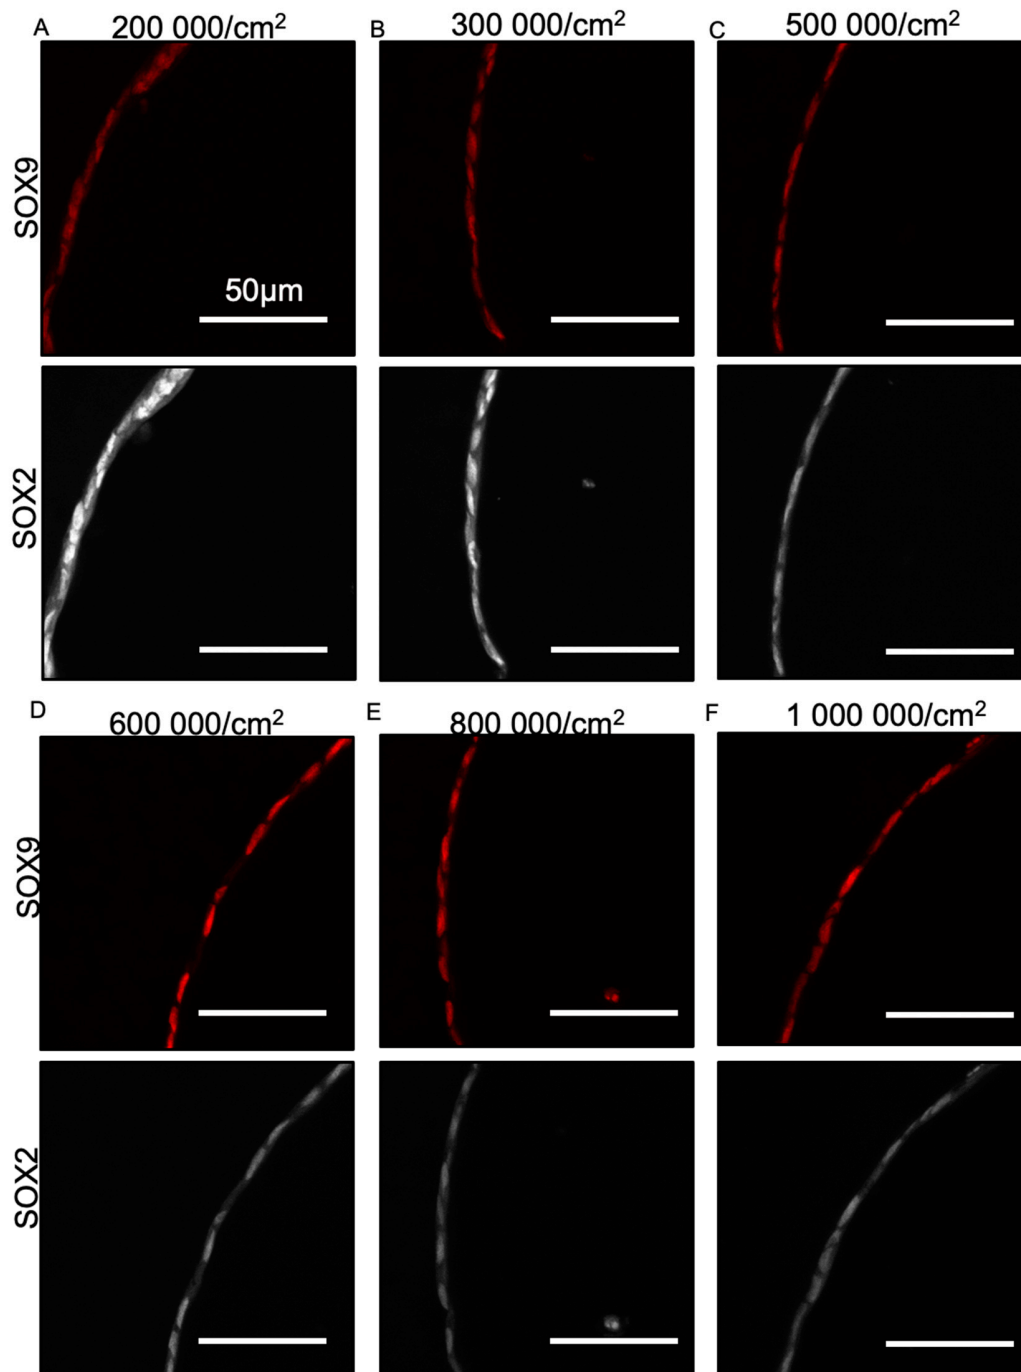

**Supplemental Figure S4. SOX2, SOX9 status across different seeding densities.** Fluorescent micrographs of day 17 lung progenitors seeded for 8 days in 400µm tubes and stained for SOX9 (red) and SOX2 (white) are single positive for SOX9 in 200 000 cells/cm<sup>2</sup> (A), 300 000 cells/cm<sup>2</sup> (B), 500 000 cells/cm<sup>2</sup> (C), 600 000 cells/cm<sup>2</sup> (D), 800 000 cells/cm<sup>2</sup> (E), 1 000 000 cells/cm<sup>2</sup> (F).
